# Supplementary material for: Pressure dependent aerosol formation from the cyclohexene gas-phase ozonolysis in the presence and absence of sulfur dioxide: a new perspective on the stabilisation of the initial clusters
Source: Royal Society of Chemistry journal article supplement (doi:10.1039/c2cp40714k), 2012-01-01
Supplement: c2cp40714k.pdf [file c2cp40714k.pdf]

## Supplementary Material

### Kinetic Model

Below, the kinetic mechanism for simulating sulfuric acid formation during the cyclohexene ozonolysis is presented. An OH yield of 50% (average of results of this study and previous work) is assumed and implemented as a prompt Criegee Intermediate (CI) decomposition channel. A 5 % fraction of stabilised CI and 45 % fraction of isomerisation channels without OH formation are assumed. These assumptions, however, do not influence the model predictions. The same holds for most of the reactions belonging to the oxy-hydrogen chemistry, which are included as a sub-mechanism in order to account for OH loss different from reactions with hydrocarbons and sulfuric acid.

**Table 1** List of the reactions considered in the kinetic model, with  $\rightleftharpoons$  depicting a reversible reaction,  $\longrightarrow$  an irreversible reaction and M a bath gas molecule

| Nr. | Reaction                                                   | $A/cm^3 mol^{-1} s^{-1}$ | $n$  | $E_a/kJ mol^{-1}$ | Reference                    |
|-----|------------------------------------------------------------|--------------------------|------|-------------------|------------------------------|
| 1   | $O_2 + H \rightleftharpoons OH \cdot + O$                  | $2.0 \cdot 10^{+14}$     | 0.0  | 70.3              | Baulch et al. <sup>1</sup>   |
| 2   | $H_2 + O \rightleftharpoons OH \cdot + H$                  | $5.1 \cdot 10^{+04}$     | 2.67 | 26.3              | Baulch et al. <sup>1</sup>   |
| 3   | $H_2 + OH \cdot \rightleftharpoons H_2O + H$               | $1.0 \cdot 10^{+08}$     | 1.6  | 13.8              | Baulch et al. <sup>1</sup>   |
| 4   | $OH \cdot + OH \cdot \rightleftharpoons H_2O + O$          | $1.5 \cdot 10^{+09}$     | 1.14 | 0.42              | Baulch et al. <sup>1</sup>   |
| 5   | $H + O_2 + M \rightleftharpoons HO_2 \cdot + M$            | $2.3 \cdot 10^{+18}$     | -0.8 | 0.0               | Maas et al. <sup>2</sup>     |
| 6   | $HO_2 \cdot + H \rightleftharpoons OH \cdot + OH \cdot$    | $1.5 \cdot 10^{+14}$     | 0.0  | 4.2               | Maas et al. <sup>2</sup>     |
| 7   | $HO_2 \cdot + H \rightleftharpoons H_2 + O_2$              | $2.5 \cdot 10^{+13}$     | 0.0  | 2.9               | Maas et al. <sup>2</sup>     |
| 8   | $HO_2 \cdot + H \rightleftharpoons H_2O + O$               | $3.0 \cdot 10^{+13}$     | 0.0  | 7.2               | Baulch et al. <sup>1</sup>   |
| 9   | $HO_2 \cdot + O \rightleftharpoons OH \cdot + O_2$         | $1.8 \cdot 10^{+13}$     | 0.0  | -1.7              | Maas et al. <sup>2</sup>     |
| 10  | $SO_2 + OH \cdot \longrightarrow HOSO_2 \cdot$             | $1.00 \cdot 10^{+12}$    | 0.0  | 0.0               | Somnitz et al. <sup>3</sup>  |
| 11  | $HOSO_2 \cdot + O_2 \longrightarrow SO_3 + HO_2 \cdot$     | $2.59 \cdot 10^{+11}$    | 0.0  | 0.0               | Atkinson et al. <sup>4</sup> |
| 12  | $SO_3 + H_2O \longrightarrow H_2SO_4$                      | $7.23 \cdot 10^{+8}$     | 0.0  | 0.0               | Reiner et al. <sup>5</sup>   |
| 13  | $OH \cdot + H_2SO_4 \longrightarrow HOSO_3 + H_2O$         | $9.03 \cdot 10^{+09}$    | 0.0  | 0.0               | Anglada et al. <sup>6</sup>  |
| 14  | $HOSO_2 \cdot \longrightarrow SO_2 + OH \cdot$             | $2.30 \cdot 10^{-05}$    | 0.0  | 0.0               | Somnitz et al. <sup>3</sup>  |
| 15  | $O_3 + C_6H_{10} \longrightarrow C_6H_{10}O_3$             | $5.10 \cdot 10^{+07}$    | 0.0  | 0.0               | this work                    |
| 16  | $C_6H_{10}O_3 \longrightarrow OH \cdot + C_6H_9O_2$        | $0.50 \cdot 10^{+06}$    | 0.0  | 0.0               | see text                     |
| 17  | $C_6H_{10}O_3 \longrightarrow SCI$                         | $0.05 \cdot 10^{+06}$    | 0.0  | 0.0               | see text                     |
| 18  | $C_6H_{10}O_3 \longrightarrow$ decomposition products      | $0.45 \cdot 10^{+06}$    | 0.0  | 0.0               | see text                     |
| 19  | $SCI \longrightarrow$ decomposition products               | $5.00 \cdot 10^{+01}$    | 0.0  | 0.0               | Nguyen et al. <sup>7</sup>   |
| 20  | $OH \cdot + C_6H_{10} \longrightarrow C_6H_9 \cdot + H_2O$ | $4.09 \cdot 10^{+13}$    | 0.0  | 0.0               | Wolf <sup>8</sup>            |
| 21  | $OH \cdot + C_6H_{10} \longrightarrow C_6H_{11}O$          | $3.63 \cdot 10^{+13}$    | 0.0  | 0.0               | Peeters et al. <sup>9</sup>  |
| 22  | $C_6H_9 \cdot + O_2 \longrightarrow C_6H_9O_2$             | $1.80 \cdot 10^{+12}$    | 0.0  | 0.0               | Wu et al. <sup>10</sup>      |

$k = A \cdot T^n \cdot \exp(-E_a / RT)$ , the unity of A is  $s^{-1}$  for unimolecular reactions.

- 1 D. L. Baulch, C. J. Cobos, R. A. Cox, C. Esser, P. Frank, T. Just, J. A. Kerr, M. J. Pilling, J. Troe, R. W. Walker and J. Warnatz, *J. Phys. Chem. Ref. Data*, 1992, **21**, 411–429.
- 2 U. Maas and J. Warnatz, *Combust. Flame*, 1988, **74**, 53–69.
- 3 R. Atkinson, D. L. Baulch, R. A. Cox, J. N. Crowley, R. F. Hampson, R. G. Hynes, M. E. Jenkin, M. J. Rossi and J. Troe, *Atmos. Chem. Phys.*, 2004, **4**, 1461–1738.
- 4 T. Reiner and F. Arnold, *J. Chem. Phys.*, 1994, **101**, 7399–7407.
- 5 J. M. Anglada, S. Olivella and A. Sole, *J. Phys. Chem. A*, 2006, **3**, 1982–1990.
- 6 H. Somnitz, *Phys. Chem. Chem. Phys.*, 2004, **6**, 3844–3851.
- 7 T. L. Nguyen, J. Peeters and L. Vereecken, *Phys. Chem. Chem. Phys.*, 2009, **11**, 5643–5656.
- 8 J. L. Wolf, *PhD thesis*, Universität Göttingen, Berlin, 2010.
- 9 J. Peeters, W. Boullart, V. Pultau, S. Vandenbergk and L. Vereecken, *J. Phys. Chem. A*, 2007, **111**, 1618–1631.
- 10 D. Wu and K. D. Bayes, *Int. J. Chem. Kinet.*, 1986, **18**, 547–554.

## Influence of humidity on sulfuric acid formation

The kinetic model presented on the preceding pages was used to simulate sulfuric acid formation for different humidity. Ozonolysis reactions in gas mixtures similar to the experiments were modelled. Only for the driest conditions (1 ppm H<sub>2</sub>O) a slight retardation of H<sub>2</sub>SO<sub>4</sub> formation is predicted. Above 10 ppm further increasing the humidity does only marginally influence H<sub>2</sub>SO<sub>4</sub> concentration-time profiles. Assuming  $x(\text{H}_2\text{O})$  to be above 1 ppm, the low humidity is not critical for sulfuric acid formation. This is in agreement with the experimental observations.

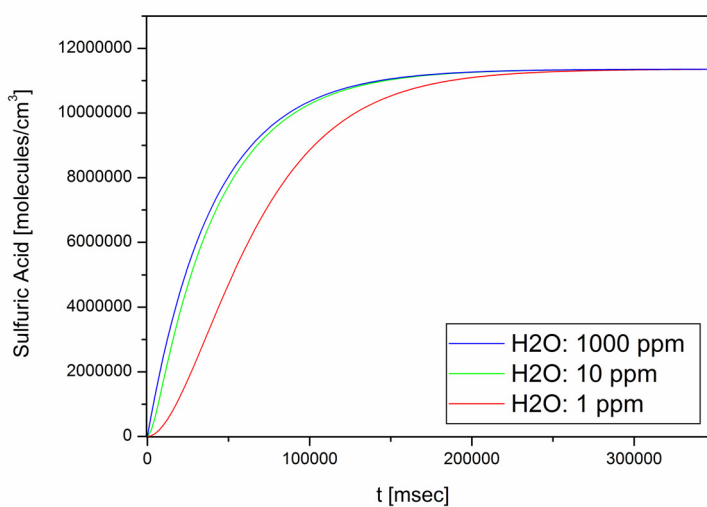

$$x_0(\text{CHEX})=10 \text{ ppm}, x_0(\text{O}_3) = 1 \text{ ppm}.$$

### Simultaneous formation of sulfuric acid and consumption of ozone

The simulation of ozone consumptions and H<sub>2</sub>SO<sub>4</sub> formation in a typical experiment. Kinetic modeling shows that sulfuric acid formation and intermediate ozonolysis chemistry run in parallel. Therefore cross reactions such as Cl + H<sub>2</sub>SO<sub>4</sub> are possible.

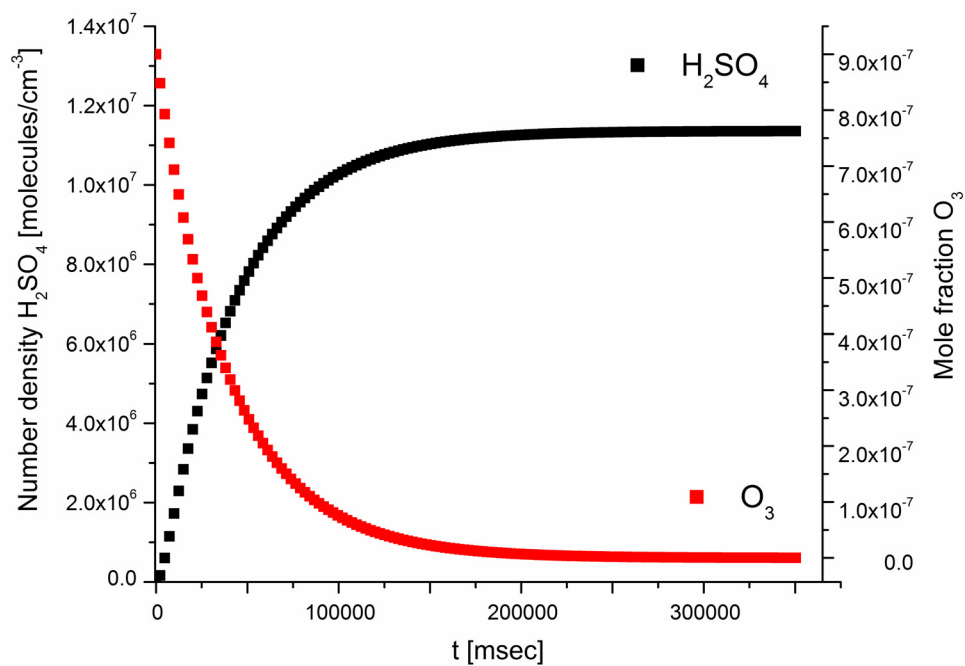

$$x_0(\text{CHEX})=10 \text{ ppm}, x_0(\text{O}_3) = 1 \text{ ppm}, x_0(\text{H}_2\text{O}) = 5 \text{ ppm}.$$
